# Supplementary material for: Fluorescent labeling agents change binding profiles of glycan-binding proteins
Source: Royal Society of Chemistry journal article supplement (doi:10.1039/c1mb05332a), 2011-10-18
Supplement: c1mb05332a.pdf [file c1mb05332a.pdf]

## Fluorescent Labeling Agents Change Binding Profiles of Glycan-Binding Proteins

### SUPPLEMENTARY INFORMATION:

**Structural drawings of 24 oligosaccharides** (Figure S1). Structures of 24 oligosaccharides as listed in Table 1 are drawn in Figure S1, including that of a biotin-conjugated linker.

**ECA-glycan binding profile** (Figure S2). The non-labeled protein binds primarily to Gal $\beta$ 1-4Glc $\beta$  (OS-3), Gal $\beta$ 1-4GlcNAc $\beta$  (OS-5), Gal $\beta$ 1-4GlcNAc $\beta$ 6S $\beta$  (OS-6), and Gal $\beta$ 1-3GlcNAc $\beta$  (OS-7)<sup>1,2</sup>. FITC-labeling enhances the affinity of ECA binding to Gal $\beta$ 1-4Glc $\beta$  (OS-3) while reducing the affinity to Gal $\beta$ 1-3GlcNAc $\beta$  (OS-7). In addition, FITC-ECA binds to Gal $\beta$ -biotin (OS-1) while the non-labeled lectin does not.

**PNA-glycan binding profile** (Figure S3). The non-labeled lectin binds to 2 out of 24 glycans. The binding dissociation constants of the non-labeled lectin to Gal $\beta$ 1-4Glc $\beta$  (OS-1) and Gal $\beta$ 1-3GalNAc $\beta$  (OS-9) are 3  $\mu$ M and 300 nM, respectively<sup>3</sup>. In comparison, FITC-labeled PNA only binds to Gal $\beta$ 1-3GalNAc $\beta$  (OS-9) with a higher affinity.

**MAA-glycan binding profiles** (Figure S4). Non-labeled lectin primarily binds to 4  $\alpha$ 2-3-linked sialyl lactosides or  $\alpha$ 2-3-linked sialyl type II glycans (OS-11 through OS-14)<sup>4, 5</sup> with dissociation constants around 100 nM or lower. Additionally, it also binds to Gal $\beta$ 1-4Glc $\beta$  (OS-3) and Gal $\beta$ 1-4GlcNAc $\beta$ 6S $\beta$  (OS-6)<sup>6</sup>. Upon labeling with FITC, the affinity of MAA binding to these four  $\alpha$ 2-3-linked sialosides (OS-11 through OS-14) and Gal $\beta$ 1-4Glc $\beta$  decreases substantially, by as

much as 2 orders of magnitudes. In addition, FITC-MAA binds to Gal $\beta$ 1-4GlcNAc $\beta$  (OS-5) instead of Gal $\beta$ 1-4GlcNAc6S $\beta$  (OS-6).

**WFA-glycan binding profile** (Figure S5). Non-labeled WFA does not bind to any sialosides tested. The lectin binds to 8 out of 9 asialoglycans (OS-1 through OS-9 except for OS-4)<sup>7</sup>. The overall binding affinity profile of WFA remains unchanged when the lectin is labeled with FITC. Nevertheless, the association constants change either up or down by a factor of less than 10 and a discernable pattern is not be able to be identified.

**SNA-glycan binding profile** (Figure S6). Non-labeled SNA binds only to  $\alpha$ 2-6-linked sialosides (OS-19 through OS-24) except for Neu5Ac $\alpha$ 2-6GalNAc $\alpha$ <sup>5, 8</sup>. The overall binding affinity profile remains unchanged upon labeling with FITC except for minor changes in association constants (within a factor of 10) with no clearly identifiable trends.

*Equilibrium dissociation constants of 7 unlabeled and FITC-labeled lectins with 24 glycans* are tabulated in Table-S1, Table-S2, Table-S3, Table-S4, Table-S5, Table-S6, Table-S7, and Table-S8. We only list the constants of more tightly bound lectin-glycan complexes, i.e., those corresponding to solid columns in Figure 3 through Figure 5 and Figure S2 through S6.

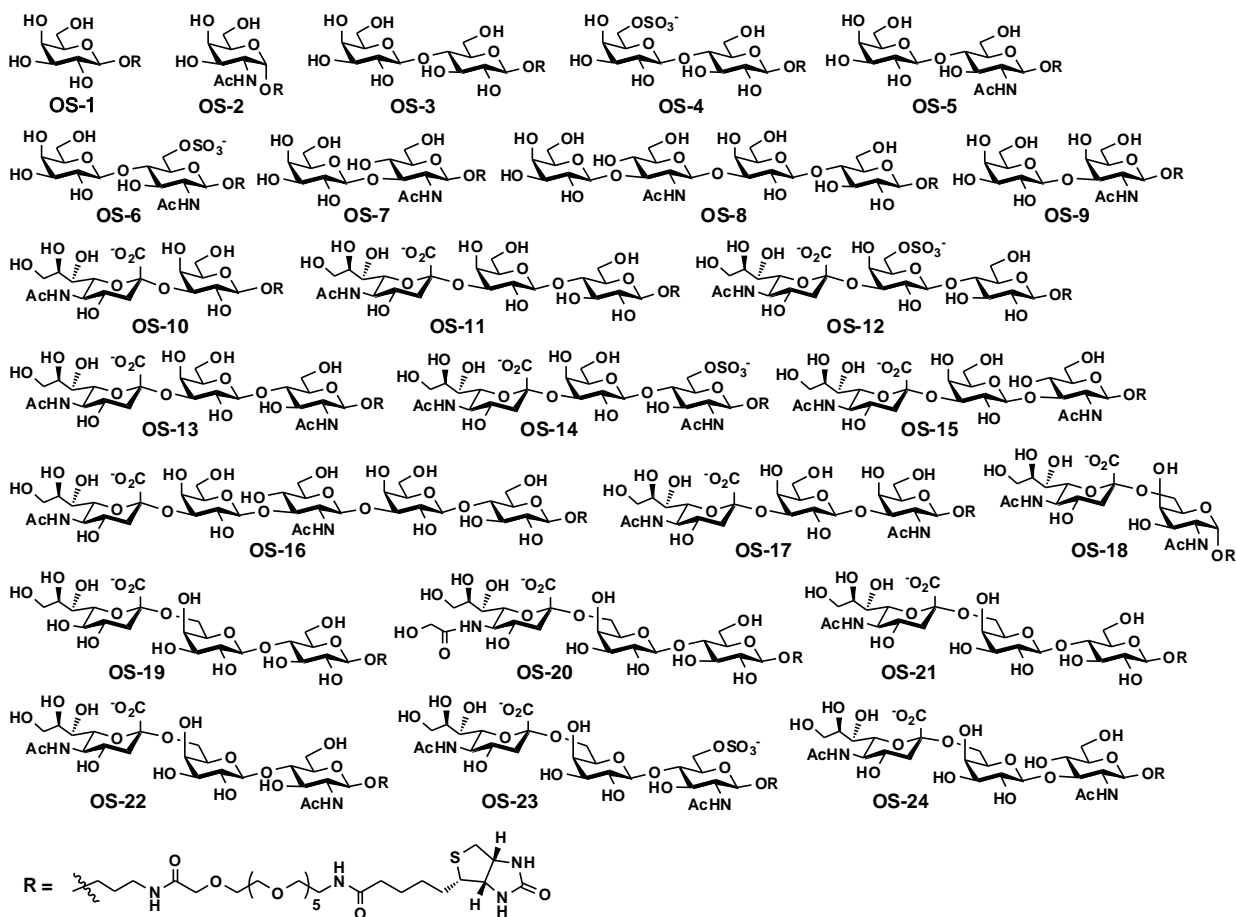

Figure S1. Structures of 24 oligosaccharides marked by the glycan ID numbers. Each oligosaccharide is conjugated to a biotin through a HEG linker so that when the biotin anchors the conjugate on a streptavidin-coated glass surface, the oligosaccharide remains functionally accessible by solution-phase glycan-binding proteins.

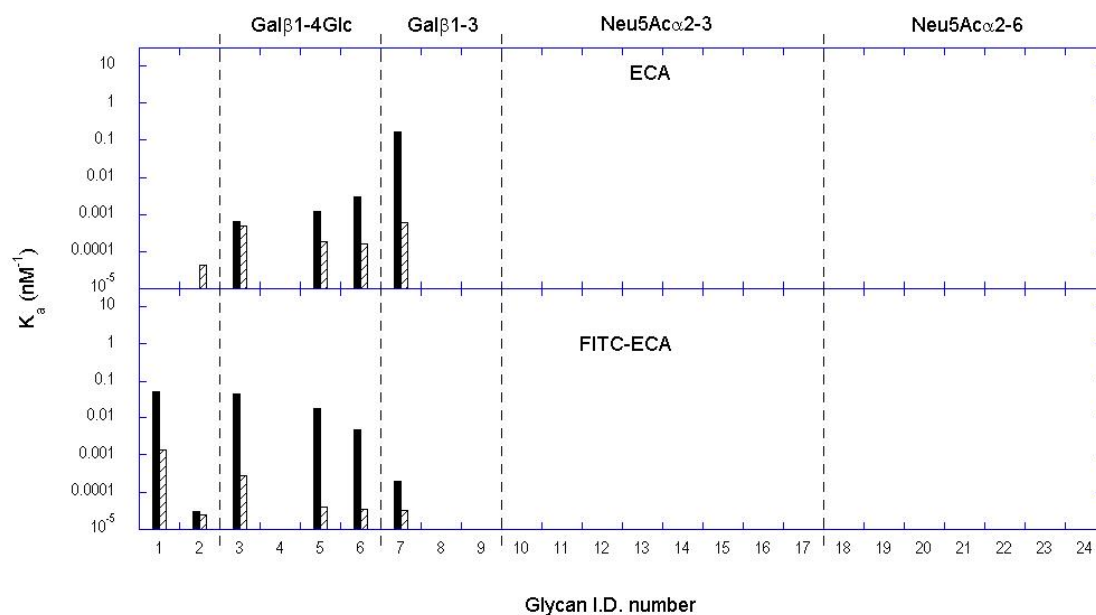

Figure S2. Equilibrium association constants of ECA (top panel) and FITC-ECA (bottom panel) binding to 24 glycans. FITC labeling mainly causes the affinity of ECA to increase except for OS-2 and OS-7.

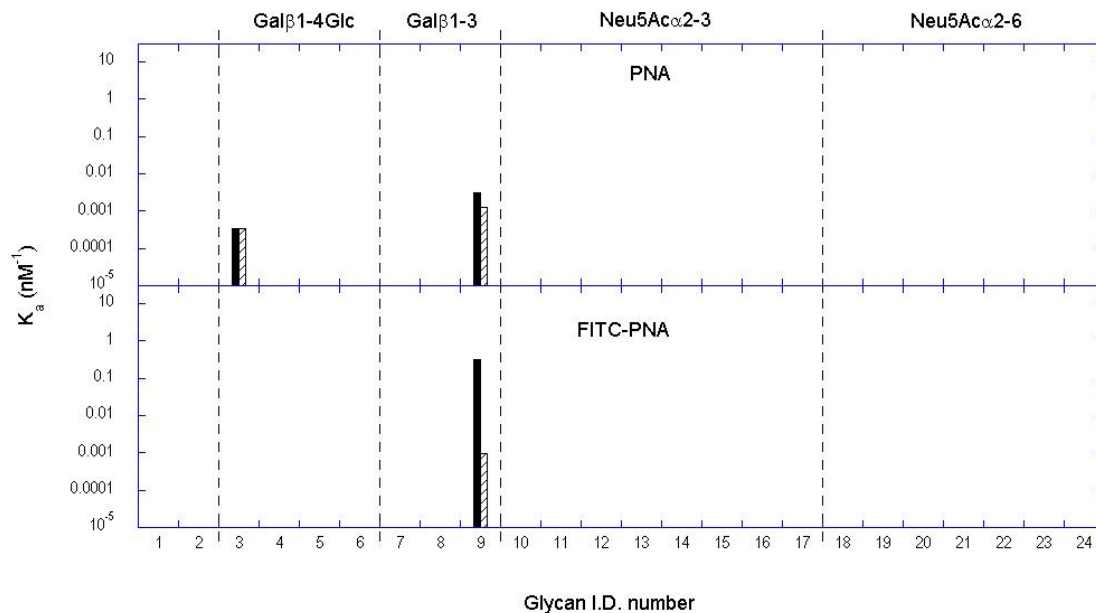

Figure S3. Equilibrium association constants of PNA (top panel) and FITC-PNA (bottom panel) binding to 24 glycans. Unlike non-labeled PNA, FITC-PNA does not bind to OS-3, yet the labeled PNA binds to OS-9 with a 100-fold increased affinity.

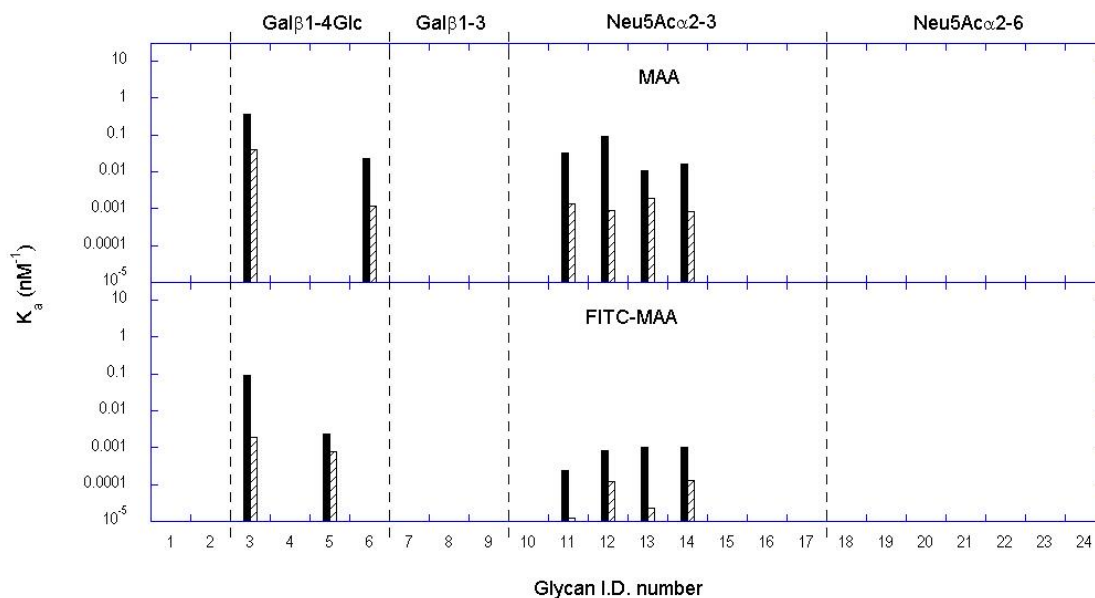

Figure S4. Equilibrium association constants of MAA (top panel) and FITC-MAA (bottom panel) binding to 24 glycans. FITC labeling mainly reduces the affinity of MAA to 4  $\alpha$ 2-3-linked sialosides (OS-11 through OS-14) and to Gal $\beta$ 1-4Glc $\beta$  (OS-3). Interestingly, unlike non-labeled MAA which binds to Gal $\beta$ 1-4GlcNAc6S $\beta$  (OS-6), the FITC-MAA binds to Gal $\beta$ 1-4GlcNAc $\beta$  (OS-5) instead.

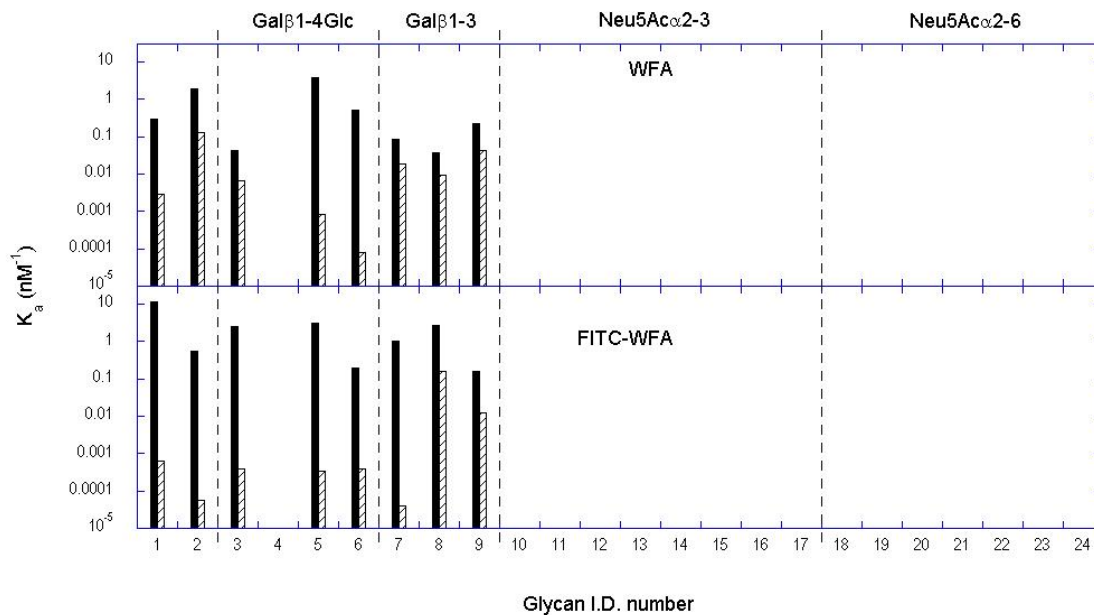

Figure S5. Equilibrium association constants of WFA (top panel) and FITC-WFA (bottom panel) binding to 24 glycans. FITC labeling only changes the magnitudes of the affinity constants (association constants) within a factor of 10, and the overall affinity profile remains intact.

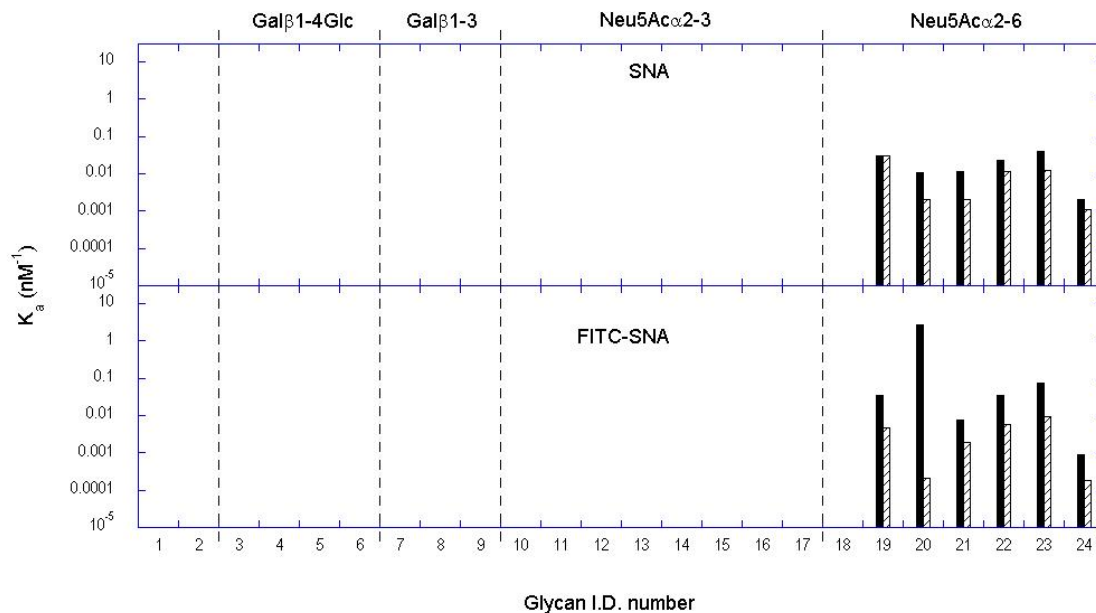

Figure S6. Equilibrium association constants of SNA (top panel) and FITC-SNA (bottom panel) binding to 24 glycans. FITC labeling does not change the overall affinity profile of SNA except for the values of association constants more or less within a factor of 10.



Table-S1:        Equilibrium dissociation constants  $K_d$  of unlabeled and FITC-labeled WGA with 24 glycans. Only the constants of the more tightly bound lectin-glycan complexes are listed, corresponding to the solid columns ( $K_a = 1/K_d$ ) in Figure 3. Symbol “\*” means  $K_d > 500 \mu\text{M}$ .

| Glycan I.D. | Glycan structures   |                                             | Kd (nM)<br>(unlabeled WGA) | Kd (nM)<br>(FITC-WGA) |
|-------------|---------------------|---------------------------------------------|----------------------------|-----------------------|
| OS-1        | Gal                 | $\beta$ -biotin                             | *                          | *                     |
| OS-2        | GalNAc              | $\alpha$ -biotin                            | 0.87                       | 0.92                  |
| OS-3        | Gal                 | $\beta$ 1-4Glc $\beta$ -                    | *                          | *                     |
| OS-4        | Gal6S               | $\beta$ 1-4Glc $\beta$ -                    | *                          | *                     |
| OS-5        | Gal                 | $\beta$ 1-4GlcNAc $\beta$ -                 | 0.83                       | 20                    |
| OS-6        | Gal                 | $\beta$ 1-4GlcNAc6S $\beta$ -               | 0.09                       | 0.52                  |
| OS-7        | Gal                 | $\beta$ 1-3GlcNAc $\beta$ -                 | *                          | *                     |
| OS-8        | Gal                 | $\beta$ 1-3GlcNAc $\beta$ 1-3Lac $\beta$ -  | *                          | *                     |
| OS-9        | Gal                 | $\beta$ 1-3GalNAc $\beta$ -                 | *                          | *                     |
| OS-10       | Neu5Aca2-3Gal       | $\beta$ -biotin                             | 0.16                       | 51                    |
| OS-11       | Neu5Aca2-3Gal       | $\beta$ 1-4Glc $\beta$ -                    | 3.15                       | 230                   |
| OS-12       | Neu5Aca2-3Gal6S     | $\beta$ 1-4Glc $\beta$ -                    | 1.43                       | 3.9                   |
| OS-13       | Neu5Aca2-3Gal       | $\beta$ 1-4GlcNAc $\beta$ -                 | 0.12                       | 18                    |
| OS-14       | Neu5Aca2-3Gal       | $\beta$ 1-4GlcNAc6S $\beta$ -               | 0.42                       | 1460                  |
| OS-15       | Neu5Aca2-3Gal       | $\beta$ 1-3GlcNAc $\beta$ -                 | 0.79                       | 130                   |
| OS-16       | Neu5Aca2-3Gal       | $\beta$ 1-3GlcNAc $\beta$ 1, 3Lac $\beta$ - | 1.5                        | 15                    |
| OS-17       | Neu5Aca2-3Gal       | $\beta$ 1-3GalNAc $\beta$ -                 | 0.05                       | 770                   |
| OS-18       | Neu5Aca2-6GalNAc    | $\alpha$ -                                  | 7.8                        | *                     |
| OS-19       | Kdn $\alpha$ 2-6Gal | $\beta$ 1-4Glc $\beta$ -                    | *                          | *                     |
| OS-20       | Neu5Gca2-6Gal       | $\beta$ 1-4Glc $\beta$ -                    | *                          | *                     |
| OS-21       | Neu5Aca2-6Gal       | $\beta$ 1-4Glc $\beta$ -                    | 168                        | *                     |
| OS-22       | Neu5Aca2-6Gal       | $\beta$ 1-4GlcNAc $\beta$ -                 | 110                        | *                     |
| OS-23       | Neu5Aca2-6Gal       | $\beta$ 1-4GlcNAc6S $\beta$ -               | 102                        | *                     |
| OS-24       | Neu5Aca2-6Gal       | $\beta$ 1-3GlcNAc-                          | 470                        | *                     |

Table-S2:        Equilibrium dissociation constants  $K_d$  of unlabeled and FITC-labeled RCA with 24 glycans. Only the constants of the more tightly bound lectin-glycan complexes are listed, corresponding to the solid columns ( $K_a = 1/K_d$ ) in Figure 4. Symbol “\*” means  $K_d > 500 \mu\text{M}$ .

| Glycan I.D. | Glycan structures         |                                             | $K_d$ (nM)<br>(unlabeled RCA) | $K_d$ (nM)<br>(FITC-RCA) |
|-------------|---------------------------|---------------------------------------------|-------------------------------|--------------------------|
| OS-1        | Gal                       | $\beta$ -biotin                             | 0.73                          | 0.9                      |
| OS-2        | GalNAc                    | $\alpha$ -biotin                            | *                             | 51                       |
| OS-3        | Gal                       | $\beta$ 1-4Glc $\beta$ -                    | 0.73                          | 1                        |
| OS-4        | Gal6S                     | $\beta$ 1-4Glc $\beta$ -                    | 28                            | *                        |
| OS-5        | Gal                       | $\beta$ 1-4GlcNAc $\beta$ -                 | 2.3                           | 0.79                     |
| OS-6        | Gal                       | $\beta$ 1-4GlcNAc6S $\beta$ -               | 17                            | 0.96                     |
| OS-7        | Gal                       | $\beta$ 1-3GlcNAc $\beta$ -                 | 14                            | 1                        |
| OS-8        | Gal                       | $\beta$ 1-3GlcNAc $\beta$ 1-3Lac $\beta$ -  | *                             | 115                      |
| OS-9        | Gal                       | $\beta$ 1-3GalNAc $\beta$ -                 | 3.6                           | 20                       |
| OS-10       | Neu5Ac $\alpha$ 2-3Gal    | $\beta$ -biotin                             | *                             | *                        |
| OS-11       | Neu5Ac $\alpha$ 2-3Gal    | $\beta$ 1-4Glc $\beta$ -                    | *                             | *                        |
| OS-12       | Neu5Ac $\alpha$ 2-3Gal6S  | $\beta$ 1-4Glc $\beta$ -                    | *                             | *                        |
| OS-13       | Neu5Ac $\alpha$ 2-3Gal    | $\beta$ 1-4GlcNAc $\beta$ -                 | *                             | *                        |
| OS-14       | Neu5Ac $\alpha$ 2-3Gal    | $\beta$ 1-4GlcNAc6S $\beta$ -               | *                             | *                        |
| OS-15       | Neu5Ac $\alpha$ 2-3Gal    | $\beta$ 1-3GlcNAc $\beta$ -                 | *                             | *                        |
| OS-16       | Neu5Ac $\alpha$ 2-3Gal    | $\beta$ 1-3GlcNAc $\beta$ 1, 3Lac $\beta$ - | *                             | *                        |
| OS-17       | Neu5Ac $\alpha$ 2-3Gal    | $\beta$ 1-3GalNAc $\beta$ -                 | *                             | *                        |
| OS-18       | Neu5Ac $\alpha$ 2-6GalNAc | $\alpha$ -                                  | 110                           | *                        |
| OS-19       | Kdn $\alpha$ 2-6Gal       | $\beta$ 1-4Glc $\beta$ -                    | 53                            | 69                       |
| OS-20       | Neu5Gc $\alpha$ 2-6Gal    | $\beta$ 1-4Glc $\beta$ -                    | 33                            | 67                       |
| OS-21       | Neu5Ac $\alpha$ 2-6Gal    | $\beta$ 1-4Glc $\beta$ -                    | 1.7                           | 21                       |
| OS-22       | Neu5Ac $\alpha$ 2-6Gal    | $\beta$ 1-4GlcNAc $\beta$ -                 | 58                            | 1530                     |
| OS-23       | Neu5Ac $\alpha$ 2-6Gal    | $\beta$ 1-4GlcNAc6S $\beta$ -               | 2.9                           | 275                      |
| OS-24       | Neu5Ac $\alpha$ 2-6Gal    | $\beta$ 1-3GlcNAc-                          | 210                           | *                        |

Table-S3:                   Equilibrium dissociation constants  $K_d$  of unlabeled RCA and goat IgG-RCA precomplexes with 24 glycans. Only the constants of the more tightly bound lectin-glycan complexes are listed, corresponding to the solid columns ( $K_a = 1/K_d$ ) in Figure 5. Symbol “\*” means  $K_d > 500 \mu\text{M}$ .

| Glycan I.D. | Glycan structures   |                                            | Kd (nM)<br>(unlabeled RCA) | Kd (nM)<br>(IgG-RCA) |
|-------------|---------------------|--------------------------------------------|----------------------------|----------------------|
| OS-1        | Gal                 | $\beta$ -biotin                            | 0.73                       | 2.2                  |
| OS-2        | GalNAc              | $\alpha$ -biotin                           | *                          | *                    |
| OS-3        | Gal                 | $\beta$ 1-4Glc $\beta$ -                   | 0.73                       | 0.32                 |
| OS-4        | Gal6S               | $\beta$ 1-4Glc $\beta$ -                   | 28                         | *                    |
| OS-5        | Gal                 | $\beta$ 1-4GlcNAc $\beta$ -                | 2.3                        | 0.36                 |
| OS-6        | Gal                 | $\beta$ 1-4GlcNAc6S $\beta$ -              | 17                         | 2.9                  |
| OS-7        | Gal                 | $\beta$ 1-3GlcNAc $\beta$ -                | 14                         | *                    |
| OS-8        | Gal                 | $\beta$ 1-3GlcNAc $\beta$ 1-3Lac $\beta$ - | *                          | *                    |
| OS-9        | Gal                 | $\beta$ 1-3GalNAc $\beta$ -                | 3.6                        | *                    |
| OS-10       | Neu5Aca2-3Gal       | $\beta$ -biotin                            | *                          | *                    |
| OS-11       | Neu5Aca2-3Gal       | $\beta$ 1-4Glc $\beta$ -                   | *                          | *                    |
| OS-12       | Neu5Aca2-3Gal6S     | $\beta$ 1-4Glc $\beta$ -                   | *                          | *                    |
| OS-13       | Neu5Aca2-3Gal       | $\beta$ 1-4GlcNAc $\beta$ -                | *                          | *                    |
| OS-14       | Neu5Aca2-3Gal       | $\beta$ 1-4GlcNAc6S $\beta$ -              | *                          | *                    |
| OS-15       | Neu5Aca2-3Gal       | $\beta$ 1-3GlcNAc $\beta$ -                | *                          | *                    |
| OS-16       | Neu5Aca2-3Gal       | $\beta$ 1-3GlcNAc $\beta$ 1,3Lac $\beta$ - | *                          | *                    |
| OS-17       | Neu5Aca2-3Gal       | $\beta$ 1-3GalNAc $\beta$ -                | *                          | *                    |
| OS-18       | Neu5Aca2-6GalNAc    | $\alpha$ -                                 | 110                        | 141                  |
| OS-19       | Kdn $\alpha$ 2-6Gal | $\beta$ 1-4Glc $\beta$ -                   | 53                         | 177                  |
| OS-20       | Neu5Gca2-6Gal       | $\beta$ 1-4Glc $\beta$ -                   | 33                         | 82                   |
| OS-21       | Neu5Aca2-6Gal       | $\beta$ 1-4Glc $\beta$ -                   | 1.7                        | 1.1                  |
| OS-22       | Neu5Aca2-6Gal       | $\beta$ 1-4GlcNAc $\beta$ -                | 58                         | 31                   |
| OS-23       | Neu5Aca2-6Gal       | $\beta$ 1-4GlcNAc6S $\beta$ -              | 2.9                        | 10.4                 |
| OS-24       | Neu5Aca2-6Gal       | $\beta$ 1-3GlcNAc-                         | 210                        | *                    |

Table-S4:        Equilibrium dissociation constants  $K_d$  of unlabeled and FITC-labeled ECA with 24 glycans. Only the constants of the more tightly bound lectin-glycan complexes are listed, corresponding to the solid columns ( $K_a = 1/K_d$ ) in Figure S2. Symbol “\*” means  $K_d > 500 \mu\text{M}$ .

| Glycan I.D. | Glycan structures   |                                             | Kd (nM)<br>(unlabeled ECA) | Kd (nM)<br>(FITC-ECA) |
|-------------|---------------------|---------------------------------------------|----------------------------|-----------------------|
| OS-1        | Gal                 | $\beta$ -biotin                             | *                          | 20                    |
| OS-2        | GalNAc              | $\alpha$ -biotin                            | 0.03                       | 33700                 |
| OS-3        | Gal                 | $\beta$ 1-4Glc $\beta$ -                    | 1570                       | 21                    |
| OS-4        | Gal6S               | $\beta$ 1-4Glc $\beta$ -                    | *                          | *                     |
| OS-5        | Gal                 | $\beta$ 1-4GlcNAc $\beta$ -                 | 820                        | 54                    |
| OS-6        | Gal                 | $\beta$ 1-4GlcNAc6S $\beta$ -               | 336                        | 220                   |
| OS-7        | Gal                 | $\beta$ 1-3GlcNAc $\beta$ -                 | 6.2                        | 5100                  |
| OS-8        | Gal                 | $\beta$ 1-3GlcNAc $\beta$ 1-3Lac $\beta$ -  | *                          | *                     |
| OS-9        | Gal                 | $\beta$ 1-3GalNAc $\beta$ -                 | *                          | *                     |
| OS-10       | Neu5Aca2-3Gal       | $\beta$ -biotin                             | *                          | *                     |
| OS-11       | Neu5Aca2-3Gal       | $\beta$ 1-4Glc $\beta$ -                    | *                          | *                     |
| OS-12       | Neu5Aca2-3Gal6S     | $\beta$ 1-4Glc $\beta$ -                    | *                          | *                     |
| OS-13       | Neu5Aca2-3Gal       | $\beta$ 1-4GlcNAc $\beta$ -                 | *                          | *                     |
| OS-14       | Neu5Aca2-3Gal       | $\beta$ 1-4GlcNAc6S $\beta$ -               | *                          | *                     |
| OS-15       | Neu5Aca2-3Gal       | $\beta$ 1-3GlcNAc $\beta$ -                 | *                          | *                     |
| OS-16       | Neu5Aca2-3Gal       | $\beta$ 1-3GlcNAc $\beta$ 1, 3Lac $\beta$ - | *                          | *                     |
| OS-17       | Neu5Aca2-3Gal       | $\beta$ 1-3GalNAc $\beta$ -                 | *                          | *                     |
| OS-18       | Neu5Aca2-6GalNAc    | $\alpha$ -                                  | *                          | *                     |
| OS-19       | Kdn $\alpha$ 2-6Gal | $\beta$ 1-4Glc $\beta$ -                    | *                          | *                     |
| OS-20       | Neu5Gca2-6Gal       | $\beta$ 1-4Glc $\beta$ -                    | *                          | *                     |
| OS-21       | Neu5Aca2-6Gal       | $\beta$ 1-4Glc $\beta$ -                    | *                          | *                     |
| OS-22       | Neu5Aca2-6Gal       | $\beta$ 1-4GlcNAc $\beta$ -                 | *                          | *                     |
| OS-23       | Neu5Aca2-6Gal       | $\beta$ 1-4GlcNAc6S $\beta$ -               | *                          | *                     |
| OS-24       | Neu5Aca2-6Gal       | $\beta$ 1-3GlcNAc-                          | *                          | *                     |

Table-S5:        Equilibrium dissociation constants  $K_d$  of unlabeled and FITC-labeled PNA with 24 glycans. Only the constants of the more tightly bound lectin-glycan complexes are listed, corresponding to the solid columns ( $K_a = 1/K_d$ ) in Figure S3. Symbol “\*” means  $K_d > 500 \mu\text{M}$ .

| Glycan I.D. | Glycan structures         |                                             | Kd (nM)<br>(unlabeled PNA) | Kd (nM)<br>(FITC-PNA) |
|-------------|---------------------------|---------------------------------------------|----------------------------|-----------------------|
| OS-1        | Gal                       | $\beta$ -biotin                             | *                          | *                     |
| OS-2        | GalNAc                    | $\alpha$ -biotin                            | *                          | *                     |
| OS-3        | Gal                       | $\beta$ 1-4Glc $\beta$ -                    | 2900                       | *                     |
| OS-4        | Gal6S                     | $\beta$ 1-4Glc $\beta$ -                    | *                          | *                     |
| OS-5        | Gal                       | $\beta$ 1-4GlcNAc $\beta$ -                 | *                          | *                     |
| OS-6        | Gal                       | $\beta$ 1-4GlcNAc6S $\beta$ -               | *                          | *                     |
| OS-7        | Gal                       | $\beta$ 1-3GlcNAc $\beta$ -                 | *                          | *                     |
| OS-8        | Gal                       | $\beta$ 1-3GlcNAc $\beta$ 1-3Lac $\beta$ -  | *                          | *                     |
| OS-9        | Gal                       | $\beta$ 1-3GalNAc $\beta$ -                 | 317                        | 3.2                   |
| OS-10       | Neu5Ac $\alpha$ 2-3Gal    | $\beta$ -biotin                             | *                          | *                     |
| OS-11       | Neu5Ac $\alpha$ 2-3Gal    | $\beta$ 1-4Glc $\beta$ -                    | *                          | *                     |
| OS-12       | Neu5Ac $\alpha$ 2-3Gal6S  | $\beta$ 1-4Glc $\beta$ -                    | *                          | *                     |
| OS-13       | Neu5Ac $\alpha$ 2-3Gal    | $\beta$ 1-4GlcNAc $\beta$ -                 | *                          | *                     |
| OS-14       | Neu5Ac $\alpha$ 2-3Gal    | $\beta$ 1-4GlcNAc6S $\beta$ -               | *                          | *                     |
| OS-15       | Neu5Ac $\alpha$ 2-3Gal    | $\beta$ 1-3GlcNAc $\beta$ -                 | *                          | *                     |
| OS-16       | Neu5Ac $\alpha$ 2-3Gal    | $\beta$ 1-3GlcNAc $\beta$ 1, 3Lac $\beta$ - | *                          | *                     |
| OS-17       | Neu5Ac $\alpha$ 2-3Gal    | $\beta$ 1-3GalNAc $\beta$ -                 | *                          | *                     |
| OS-18       | Neu5Ac $\alpha$ 2-6GalNAc | $\alpha$ -                                  | *                          | *                     |
| OS-19       | Kdn $\alpha$ 2-6Gal       | $\beta$ 1-4Glc $\beta$ -                    | *                          | *                     |
| OS-20       | Neu5Gc $\alpha$ 2-6Gal    | $\beta$ 1-4Glc $\beta$ -                    | *                          | *                     |
| OS-21       | Neu5Ac $\alpha$ 2-6Gal    | $\beta$ 1-4Glc $\beta$ -                    | *                          | *                     |
| OS-22       | Neu5Ac $\alpha$ 2-6Gal    | $\beta$ 1-4GlcNAc $\beta$ -                 | *                          | *                     |
| OS-23       | Neu5Ac $\alpha$ 2-6Gal    | $\beta$ 1-4GlcNAc6S $\beta$ -               | *                          | *                     |
| OS-24       | Neu5Ac $\alpha$ 2-6Gal    | $\beta$ 1-3GlcNAc-                          | *                          | *                     |

Table-S6:        Equilibrium dissociation constants  $K_d$  of unlabeled and FITC-labeled MAA with 24 glycans. Only the constants of the more tightly bound lectin-glycan complexes are listed, corresponding to the solid columns ( $K_a = 1/K_d$ ) in Figure S4. Symbol “\*” means  $K_d > 500 \mu\text{M}$ .

| Glycan I.D. | Glycan structures         |                                             | Kd (nM)<br>(unlabeled MAA) | Kd (nM)<br>(FITC-MAA) |
|-------------|---------------------------|---------------------------------------------|----------------------------|-----------------------|
| OS-1        | Gal                       | $\beta$ -biotin                             | *                          | *                     |
| OS-2        | GalNAc                    | $\alpha$ -biotin                            | *                          | *                     |
| OS-3        | Gal                       | $\beta$ 1-4Glc $\beta$ -                    | 2.8                        | 11                    |
| OS-4        | Gal6S                     | $\beta$ 1-4Glc $\beta$ -                    | *                          | *                     |
| OS-5        | Gal                       | $\beta$ 1-4GlcNAc $\beta$ -                 | *                          | 430                   |
| OS-6        | Gal                       | $\beta$ 1-4GlcNAc6S $\beta$ -               | 44                         | *                     |
| OS-7        | Gal                       | $\beta$ 1-3GlcNAc $\beta$ -                 | *                          | *                     |
| OS-8        | Gal                       | $\beta$ 1-3GlcNAc $\beta$ 1-3Lac $\beta$ -  | *                          | *                     |
| OS-9        | Gal                       | $\beta$ 1-3GalNAc $\beta$ -                 | *                          | *                     |
| OS-10       | Neu5Ac $\alpha$ 2-3Gal    | $\beta$ -biotin                             | *                          | *                     |
| OS-11       | Neu5Ac $\alpha$ 2-3Gal    | $\beta$ 1-4Glc $\beta$ -                    | 31                         | 4200                  |
| OS-12       | Neu5Ac $\alpha$ 2-3Gal6S  | $\beta$ 1-4Glc $\beta$ -                    | 11                         | 1220                  |
| OS-13       | Neu5Ac $\alpha$ 2-3Gal    | $\beta$ 1-4GlcNAc $\beta$ -                 | 94                         | 980                   |
| OS-14       | Neu5Ac $\alpha$ 2-3Gal    | $\beta$ 1-4GlcNAc6S $\beta$ -               | 59                         | 990                   |
| OS-15       | Neu5Ac $\alpha$ 2-3Gal    | $\beta$ 1-3GlcNAc $\beta$ -                 | *                          | *                     |
| OS-16       | Neu5Ac $\alpha$ 2-3Gal    | $\beta$ 1-3GlcNAc $\beta$ 1, 3Lac $\beta$ - | *                          | *                     |
| OS-17       | Neu5Ac $\alpha$ 2-3Gal    | $\beta$ 1-3GalNAc $\beta$ -                 | *                          | *                     |
| OS-18       | Neu5Ac $\alpha$ 2-6GalNAc | $\alpha$ -                                  | *                          | *                     |
| OS-19       | Kdn $\alpha$ 2-6Gal       | $\beta$ 1-4Glc $\beta$ -                    | *                          | *                     |
| OS-20       | Neu5Gc $\alpha$ 2-6Gal    | $\beta$ 1-4Glc $\beta$ -                    | *                          | *                     |
| OS-21       | Neu5Ac $\alpha$ 2-6Gal    | $\beta$ 1-4Glc $\beta$ -                    | *                          | *                     |
| OS-22       | Neu5Ac $\alpha$ 2-6Gal    | $\beta$ 1-4GlcNAc $\beta$ -                 | *                          | *                     |
| OS-23       | Neu5Ac $\alpha$ 2-6Gal    | $\beta$ 1-4GlcNAc6S $\beta$ -               | *                          | *                     |
| OS-24       | Neu5Ac $\alpha$ 2-6Gal    | $\beta$ 1-3GlcNAc-                          | *                          | *                     |

Table-S7:        Equilibrium dissociation constants  $K_d$  of unlabeled and FITC-labeled WFA with 24 glycans. Only the constants of the more tightly bound lectin-glycan complexes are listed, corresponding to the solid columns ( $K_a = 1/K_d$ ) in Figure S5. Symbol “\*” means  $K_d > 500 \mu\text{M}$ .

| Glycan I.D. | Glycan structures         |                                             | Kd (nM)<br>(unlabeled MAA) | Kd (nM)<br>(FITC-MAA) |
|-------------|---------------------------|---------------------------------------------|----------------------------|-----------------------|
| OS-1        | Gal                       | $\beta$ -biotin                             | *                          | *                     |
| OS-2        | GalNAc                    | $\alpha$ -biotin                            | *                          | *                     |
| OS-3        | Gal                       | $\beta$ 1-4Glc $\beta$ -                    | 2.8                        | 11                    |
| OS-4        | Gal6S                     | $\beta$ 1-4Glc $\beta$ -                    | *                          | *                     |
| OS-5        | Gal                       | $\beta$ 1-4GlcNAc $\beta$ -                 | *                          | 430                   |
| OS-6        | Gal                       | $\beta$ 1-4GlcNAc6S $\beta$ -               | 44                         | *                     |
| OS-7        | Gal                       | $\beta$ 1-3GlcNAc $\beta$ -                 | *                          | *                     |
| OS-8        | Gal                       | $\beta$ 1-3GlcNAc $\beta$ 1-3Lac $\beta$ -  | *                          | *                     |
| OS-9        | Gal                       | $\beta$ 1-3GalNAc $\beta$ -                 | *                          | *                     |
| OS-10       | Neu5Ac $\alpha$ 2-3Gal    | $\beta$ -biotin                             | *                          | *                     |
| OS-11       | Neu5Ac $\alpha$ 2-3Gal    | $\beta$ 1-4Glc $\beta$ -                    | 31                         | 4200                  |
| OS-12       | Neu5Ac $\alpha$ 2-3Gal6S  | $\beta$ 1-4Glc $\beta$ -                    | 11                         | 1220                  |
| OS-13       | Neu5Ac $\alpha$ 2-3Gal    | $\beta$ 1-4GlcNAc $\beta$ -                 | 94                         | 980                   |
| OS-14       | Neu5Ac $\alpha$ 2-3Gal    | $\beta$ 1-4GlcNAc6S $\beta$ -               | 59                         | 990                   |
| OS-15       | Neu5Ac $\alpha$ 2-3Gal    | $\beta$ 1-3GlcNAc $\beta$ -                 | *                          | *                     |
| OS-16       | Neu5Ac $\alpha$ 2-3Gal    | $\beta$ 1-3GlcNAc $\beta$ 1, 3Lac $\beta$ - | *                          | *                     |
| OS-17       | Neu5Ac $\alpha$ 2-3Gal    | $\beta$ 1-3GalNAc $\beta$ -                 | *                          | *                     |
| OS-18       | Neu5Ac $\alpha$ 2-6GalNAc | $\alpha$ -                                  | *                          | *                     |
| OS-19       | Kdn $\alpha$ 2-6Gal       | $\beta$ 1-4Glc $\beta$ -                    | *                          | *                     |
| OS-20       | Neu5Gc $\alpha$ 2-6Gal    | $\beta$ 1-4Glc $\beta$ -                    | *                          | *                     |
| OS-21       | Neu5Ac $\alpha$ 2-6Gal    | $\beta$ 1-4Glc $\beta$ -                    | *                          | *                     |
| OS-22       | Neu5Ac $\alpha$ 2-6Gal    | $\beta$ 1-4GlcNAc $\beta$ -                 | *                          | *                     |
| OS-23       | Neu5Ac $\alpha$ 2-6Gal    | $\beta$ 1-4GlcNAc6S $\beta$ -               | *                          | *                     |
| OS-24       | Neu5Ac $\alpha$ 2-6Gal    | $\beta$ 1-3GlcNAc-                          | *                          | *                     |

Table-S8:        Equilibrium dissociation constants  $K_d$  of unlabeled and FITC-labeled SNA with 24 glycans. Only the constants of the more tightly bound lectin-glycan complexes are listed, corresponding to the solid columns ( $K_a = 1/K_d$ ) in Figure S6. Symbol “\*” means  $K_d > 500 \mu\text{M}$ .

| Glycan I.D. | Glycan structures   |                                             | Kd (nM)<br>(unlabeled MAA) | Kd (nM)<br>(FITC-MAA) |
|-------------|---------------------|---------------------------------------------|----------------------------|-----------------------|
| OS-1        | Gal                 | $\beta$ -biotin                             | *                          | *                     |
| OS-2        | GalNAc              | $\alpha$ -biotin                            | *                          | *                     |
| OS-3        | Gal                 | $\beta$ 1-4Glc $\beta$ -                    | 2.8                        | 11                    |
| OS-4        | Gal6S               | $\beta$ 1-4Glc $\beta$ -                    | *                          | *                     |
| OS-5        | Gal                 | $\beta$ 1-4GlcNAc $\beta$ -                 | *                          | 430                   |
| OS-6        | Gal                 | $\beta$ 1-4GlcNAc6S $\beta$ -               | 44                         | *                     |
| OS-7        | Gal                 | $\beta$ 1-3GlcNAc $\beta$ -                 | *                          | *                     |
| OS-8        | Gal                 | $\beta$ 1-3GlcNAc $\beta$ 1-3Lac $\beta$ -  | *                          | *                     |
| OS-9        | Gal                 | $\beta$ 1-3GalNAc $\beta$ -                 | *                          | *                     |
| OS-10       | Neu5Aca2-3Gal       | $\beta$ -biotin                             | *                          | *                     |
| OS-11       | Neu5Aca2-3Gal       | $\beta$ 1-4Glc $\beta$ -                    | 31                         | 4200                  |
| OS-12       | Neu5Aca2-3Gal6S     | $\beta$ 1-4Glc $\beta$ -                    | 11                         | 1220                  |
| OS-13       | Neu5Aca2-3Gal       | $\beta$ 1-4GlcNAc $\beta$ -                 | 94                         | 980                   |
| OS-14       | Neu5Aca2-3Gal       | $\beta$ 1-4GlcNAc6S $\beta$ -               | 59                         | 990                   |
| OS-15       | Neu5Aca2-3Gal       | $\beta$ 1-3GlcNAc $\beta$ -                 | *                          | *                     |
| OS-16       | Neu5Aca2-3Gal       | $\beta$ 1-3GlcNAc $\beta$ 1, 3Lac $\beta$ - | *                          | *                     |
| OS-17       | Neu5Aca2-3Gal       | $\beta$ 1-3GalNAc $\beta$ -                 | *                          | *                     |
| OS-18       | Neu5Aca2-6GalNAc    | $\alpha$ -                                  | *                          | *                     |
| OS-19       | Kdn $\alpha$ 2-6Gal | $\beta$ 1-4Glc $\beta$ -                    | *                          | *                     |
| OS-20       | Neu5Gca2-6Gal       | $\beta$ 1-4Glc $\beta$ -                    | *                          | *                     |
| OS-21       | Neu5Aca2-6Gal       | $\beta$ 1-4Glc $\beta$ -                    | *                          | *                     |
| OS-22       | Neu5Aca2-6Gal       | $\beta$ 1-4GlcNAc $\beta$ -                 | *                          | *                     |
| OS-23       | Neu5Aca2-6Gal       | $\beta$ 1-4GlcNAc6S $\beta$ -               | *                          | *                     |
| OS-24       | Neu5Aca2-6Gal       | $\beta$ 1-3GlcNAc-                          | *                          | *                     |



## References:

1. P. M. Kaladas, E. A. Kabat, J. L. Iglesias, H. Lis and N. Sharon, *Archives of biochemistry and biophysics*, 1982, **217**, 624-637.
2. H. De Boeck, F. G. Loontjens, H. Lis and N. Sharon, *Archives of biochemistry and biophysics*, 1984, **234**, 297-304.
3. M. E. A. Pereira, E. A. Karat, R. Lotan and N. Sharon, *Carbohydrate research*, 1976, **51**, 117 - 118.
4. W. C. Wang and R. D. Cummings, *The Journal of biological chemistry*, 1988, **263**, 4576-4585.
5. S. R. Haseley, P. Talaga, J. P. Kamerling and J. F. Vliegthart, *Analytical biochemistry*, 1999, **274**, 203-210.
6. R. N. Knibbs, I. J. Goldstein, R. M. Ratcliffe and N. Shibuya, *The Journal of biological chemistry*, 1991, **266**, 83-88.
7. H. J. Allen, E. A. Johnson and K. L. Matta, *Carbohydrate research*, 1980, **86**, 123-131.
8. N. Shibuya, I. J. Goldstein, W. F. Broekaert, M. Nsimba-Lubaki, B. Peeters and W. J. Peumans, *The Journal of biological chemistry*, 1987, **262**, 1596-1601.
